# Supplementary material
Source: ML conference proceedings conference paper supplement (https://openaccess.thecvf.com/content/ICCV2021/html/Rao_RandomRooms_Unsupervised_Pre-Training_ICCV_2021_paper.html)
Supplement: Supplementary file 1 [file Rao_RandomRooms_Unsupervised_Pre-Training_ICCV_2021_supplemental.pdf]

# **RandomRooms: Unsupervised Pre-training from Synthetic Shapes and Randomized Layouts for 3D Object Detection**

## **Supplementary Material**

### **A. Details on Random Room Generation**

To more clearly show the generation process of random rooms, we provide pseudo-code and explanatory comments of our room generation method in Algorithm 1.

### **B. Visualization of Random Rooms**

We show more examples of the generated random room pairs in Figure 1.

---

**Algorithm 1** Pseudo-code of Random Room Generation

---

```
1 # objects: list of object point clouds
2
3 # object level data augmentation
4 objects = object_augmentation(objects)
5
6 # sort objects by their areas
7 objects, object_ind, obj_area = sort_object(objects)
8
9 # set the overall area of the rectangular room
10 overall_area = sum(obj_area) * 2 * 10000 * (random.random() * 0.4 + 0.6)
11 a_value = np.sqrt(overall_area)
12 a = random.randint(int(a_value*0.75), int(a_value*1.25))
13 b = int(overall_area) // a
14 a_m = float(a) / 100.
15 b_m = float(b) / 100.
16 room_state = np.zeros((a, b), dtype=np.float)
17
18 final_layout = []
19 instance_label = []
20
21 # place object to the room
22 for i in range(len(objects)):
23     obj = objects[i]
24     x, y, z = get_object_size(obj)
25
26     for _ in range(max_iter):
27         # generate the position from beta distribution
28         pos_x = np.random.beta(0.5, 0.5) * (a_m - x)
29         pos_y = np.random.beta(0.5, 0.5) * (b_m - y)
30         state_part = room_state[int(pos_x*100):int((pos_x+x)*100), int(pos_y*100): int((pos_y+y)*100)]
31         max_height = state_part.max()
32         if (max_height + z < 2.0 and max_height < 0.5) or max_height < 1e-3:
33             break
34
35         room_state[int(pos_x * 100):int((pos_x + x) * 100), int(pos_y * 100): int((pos_y + y) * 100)] += z
36         obj[:, 0] += pos_x
37         obj[:, 1] += pos_y
38         obj[:, 2] += max_height
39         final_layout.append(obj)
40         instance_label.append(np.ones((obj.shape[0],), dtype=int) * (object_ind[i] + 1))
41
42 # add floor and walls
43 final_layout, instance_label = add_floor_wall(final_layout, instance_label)
44
45 # form the final scene point cloud
46 final_layout = np.concatenate(final_layout, axis=0)
47 instance_label = np.concatenate(instance_label, axis=0)
48
49 # normalize coordinates
50 final_layout[:, 0:2] = final_layout[:, 0:2] - final_layout[:, 0:2].mean(axis=0, keepdims=True)
```

---

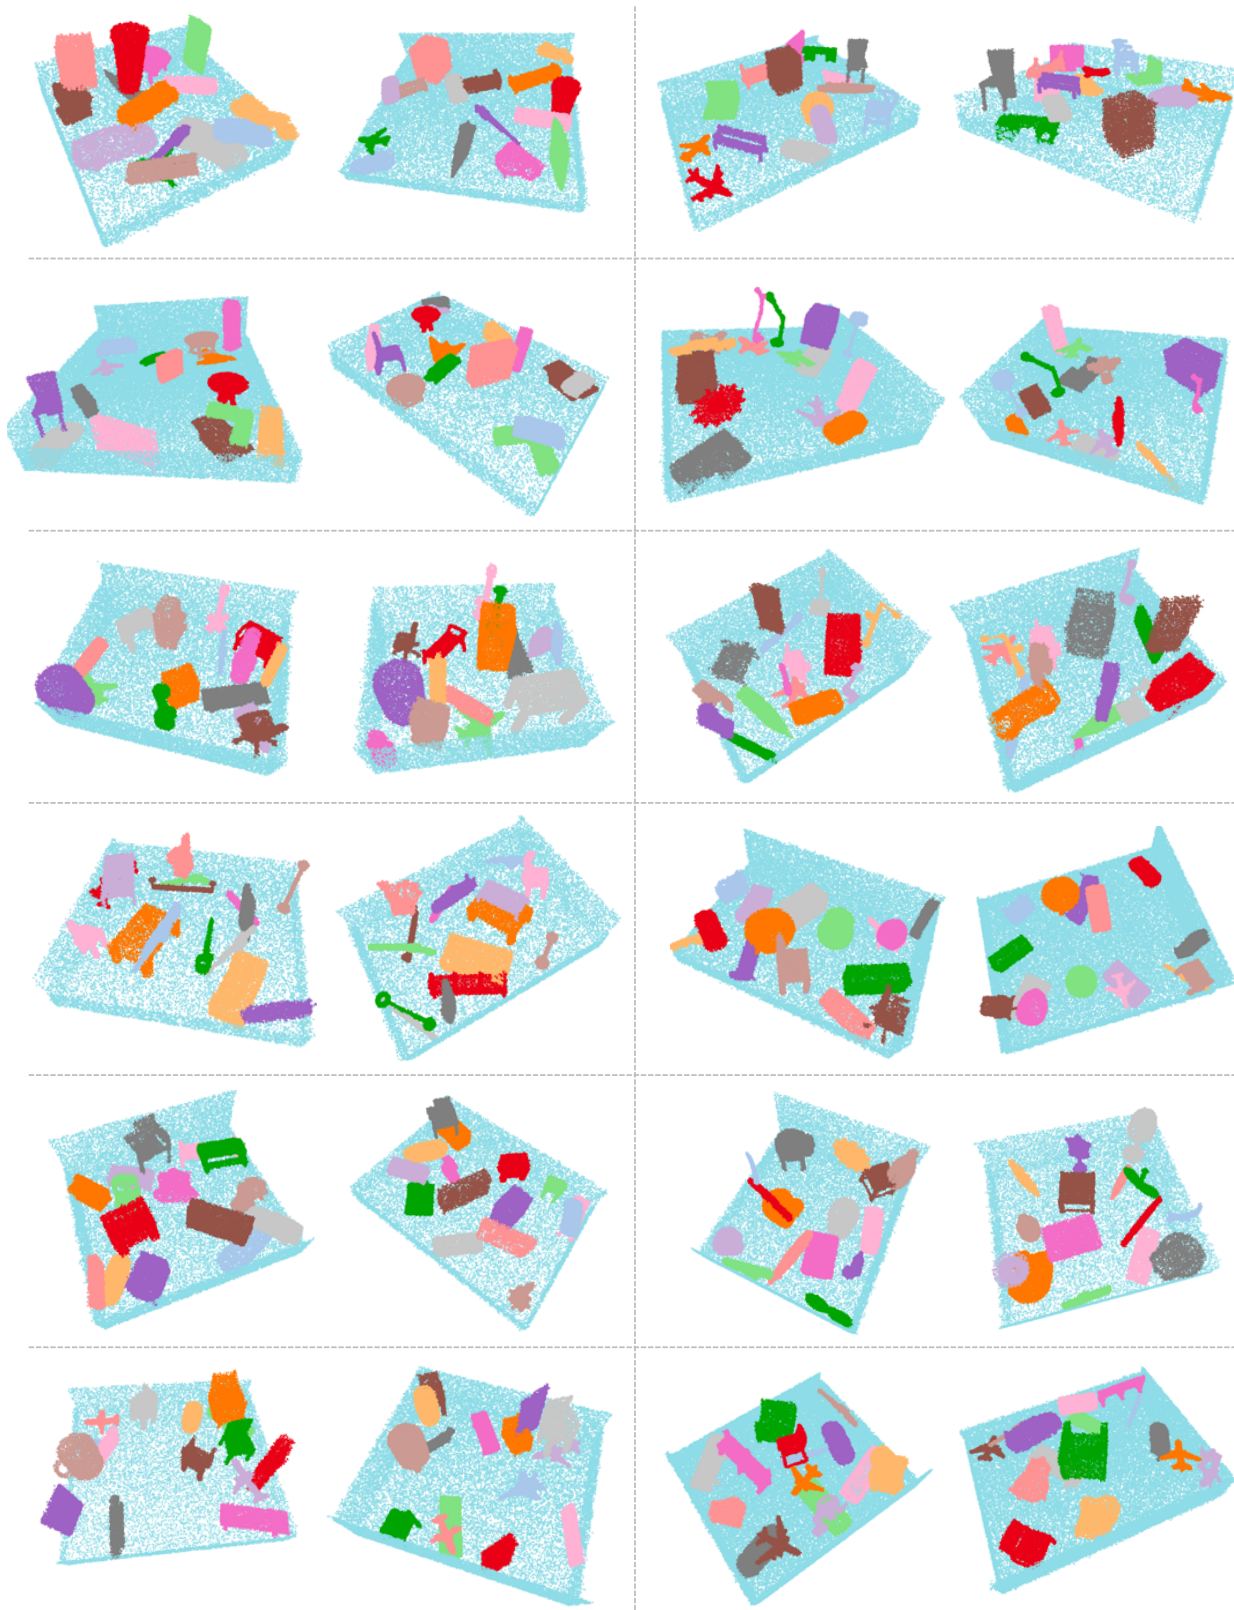

Figure 1: Visualization of the pairs of *Random Rooms*.
